# Supplementary material for: Heat-generation behavior of Fe3O4 particles in AC magnetic fields: analysis of microstructures through tilting
Source: Royal Society of Chemistry journal article supplement (doi:10.1039/d4dt02448f), 2025-01-01
Supplement: d4dt02448f1.pdf [file d4dt02448f1.pdf]

## Electronic Supplementary Information (ESI)

### Heat-Generation Behavior of Fe<sub>3</sub>O<sub>4</sub> Particles in AC Magnetic Fields: Analysis of Microstructures through Tilting†

Manas Srivastava,<sup>a</sup> Ruchi Agrawal,<sup>a,b</sup> Atom Rajiv Singh,<sup>a</sup> Leishangthem Sanatombi Devi,<sup>a,c</sup> Rashmi Joshi,<sup>a</sup> Bheeshma Pratap Singh,<sup>\*d</sup> D. Sarkar,<sup>e</sup> Rakesh Kumar Singhal,<sup>f</sup> Raghumani Singh Ningthoujam<sup>\*a,b</sup>

<sup>a</sup>Chemistry Division, Bhabha Atomic Research Centre, Mumbai 400085

<sup>b</sup>Homi Bhabha National Institute, Anushaktinagar, Mumbai 400094

<sup>c</sup>Waikhom Mani Girls' College, Thoubal 795138

<sup>d</sup>Department of Physics, GITAM, Visakhapatnam 530045

<sup>e</sup>Technical Physics Division, Bhabha Atomic Research Centre, Mumbai 400085

<sup>f</sup>Analytical Chemistry Division, Bhabha Atomic Research Centre, Mumbai 400085

(\*Corresponding authors: bsingh@gitam.edu, and bheeshmapratap@gmail.com (BPS)  
rsn@barc.gov.in, and nragnu\_mani@yahoo.co.in (RSN))

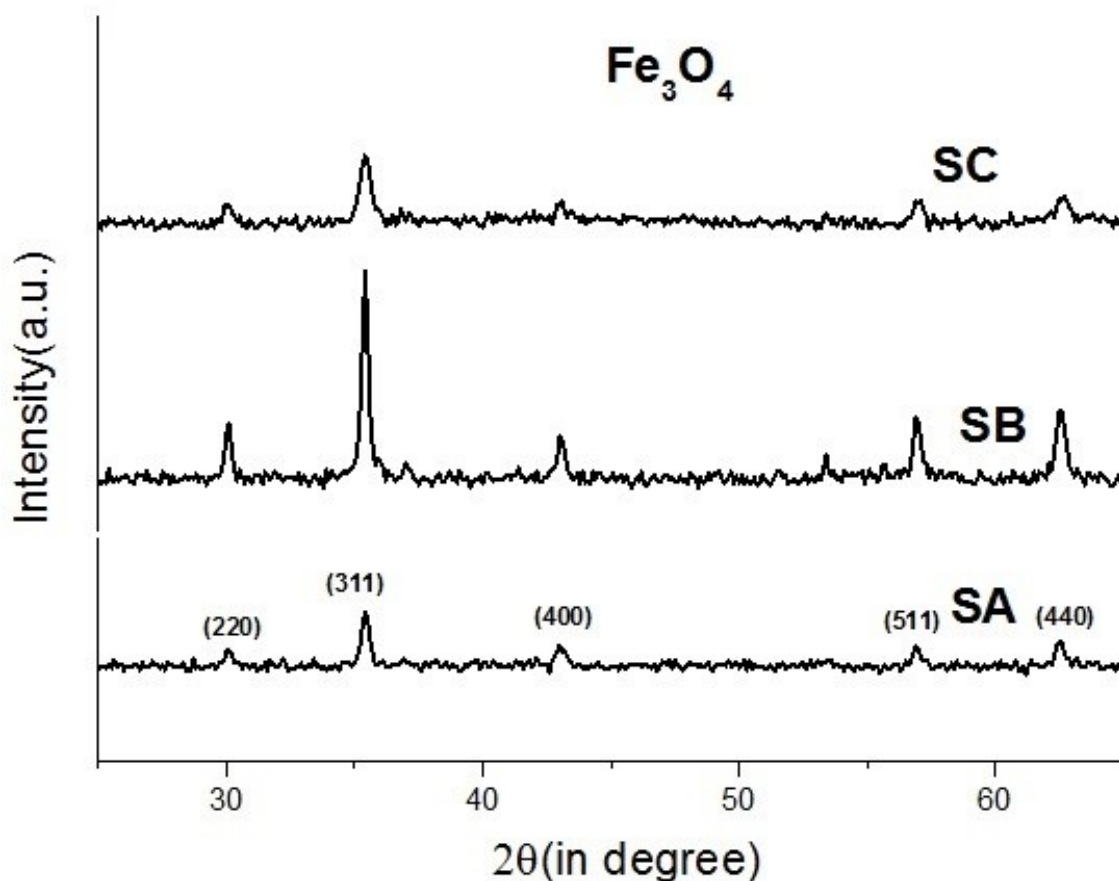

**Fig. S1.** XRD patterns of products (SA, SB, and SC) obtained during hydrothermal method. Details of reaction conditions are provided in Table 1.

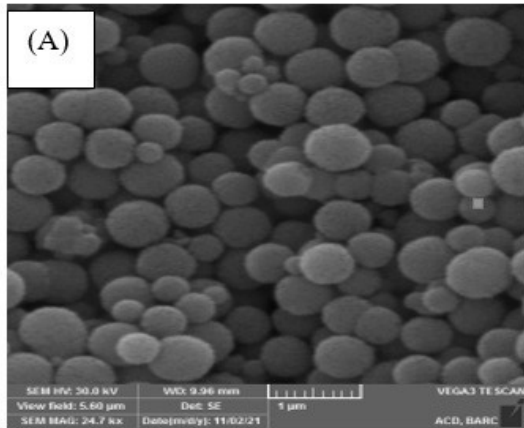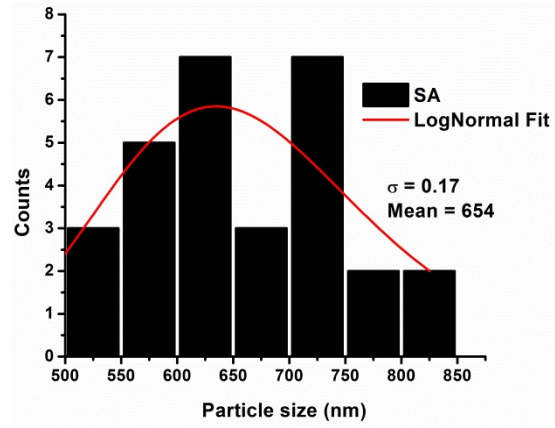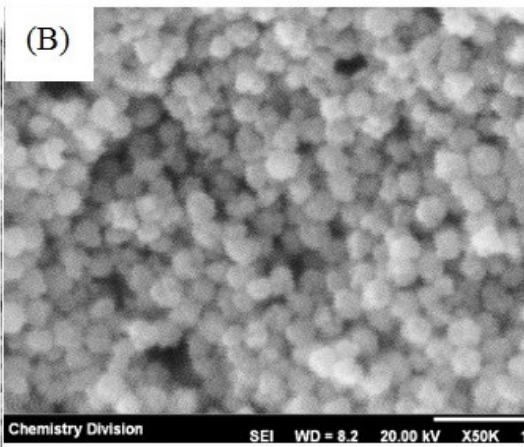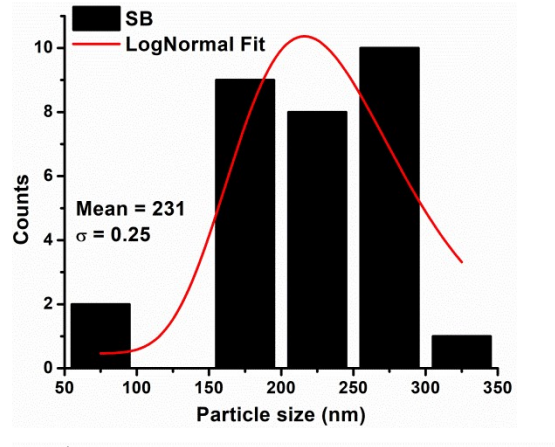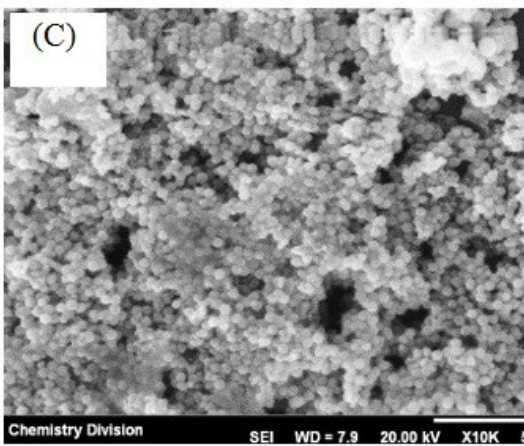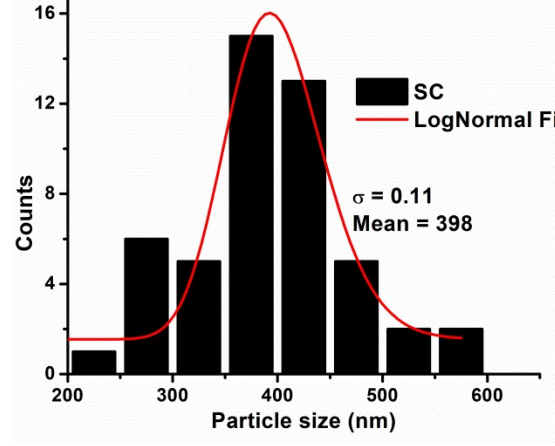

**Fig. S2** Scanning electron microscope of the following samples: (A) SA, (B) SB and (C) SC with respective particle size distribution (nm), which is indicated using histogram. This is fitted by LogNormal distribution (solid red curve).  $\sigma$  = Standard Deviation.
